# Supplementary material for: One-pot synthesis of magnetite-loaded dual-mesoporous silica spheres for T2-weighted magnetic resonance imaging and drug delivery
Source: Royal Society of Chemistry journal article supplement (doi:10.1039/c5ra04970a), 2015-01-01
Supplement: c5ra04970a1.pdf [file c5ra04970a1.pdf]

## Electronic Supplementary Information

### **One-pot synthesis of magnetite-loaded dual-mesoporous silica spheres for T<sub>2</sub>-weighted magnetic resonance imaging and drug delivery**

Xiaofeng Luo,<sup>a</sup> Dechao Niu,<sup>a\*</sup> Yao Wang,<sup>a</sup> Yungang Zhai,<sup>a</sup> Jianzhuang Chen,<sup>a</sup>

Jinlou Gu,<sup>a</sup> Jianlin Shi<sup>a b</sup> and Yongsheng Li<sup>a\*</sup>

<sup>a</sup> *Low dimensional Materials Chemistry Laboratory, School of Materials Science and Engineering, East China University of Science and Technology, Shanghai, 200237, China. E-mail: ysli@ecust.edu.cn; dcniu@ecust.edu.cn; Tel: +86-21-64250740.*

<sup>b</sup> *State Key Laboratory of High Performance Ceramics and Superfine Microstructures, Shanghai Institute of Ceramics, Chinese Academy of Sciences, 1295 Ding-xi Road, Shanghai, 200050, China.*

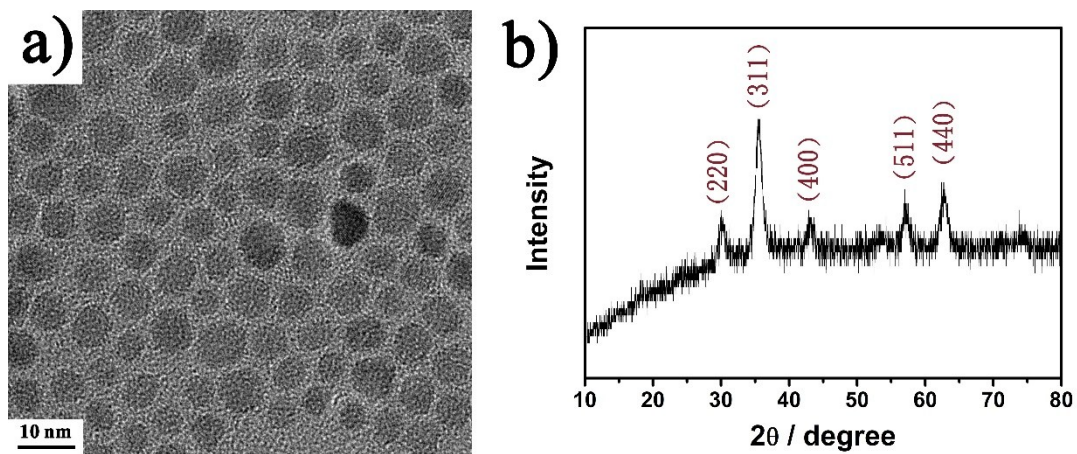

**Fig. S1** TEM image (a) and wide angle XRD pattern (b) of as-synthesized  $\text{Fe}_3\text{O}_4$  nanoparticles.

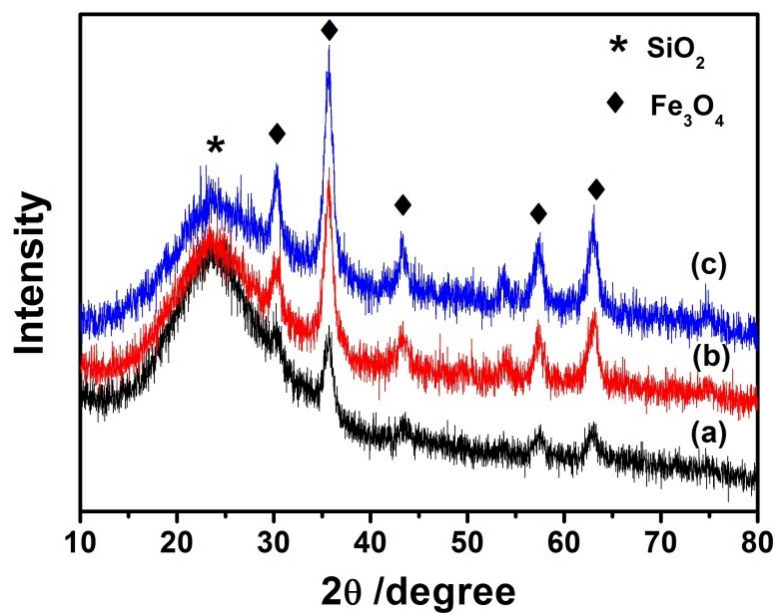

**Fig. S2** Wide angle XRD patterns of  $\text{Fe}_3\text{O}_4$ @DMSSs prepared with different amounts of  $\text{Fe}_3\text{O}_4$  nanoparticles: (a) 5 mg; (b) 15 mg; (c) 30 mg.

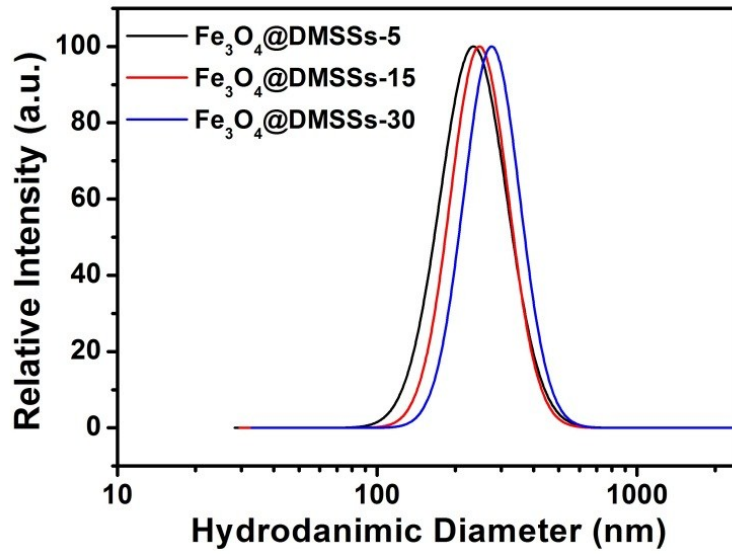

**Fig. S3** Hydrodynamic diameter distributions of Fe<sub>3</sub>O<sub>4</sub>@DMSSs prepared with different amounts of Fe<sub>3</sub>O<sub>4</sub> nanoparticles determined by DLS measurements in water.

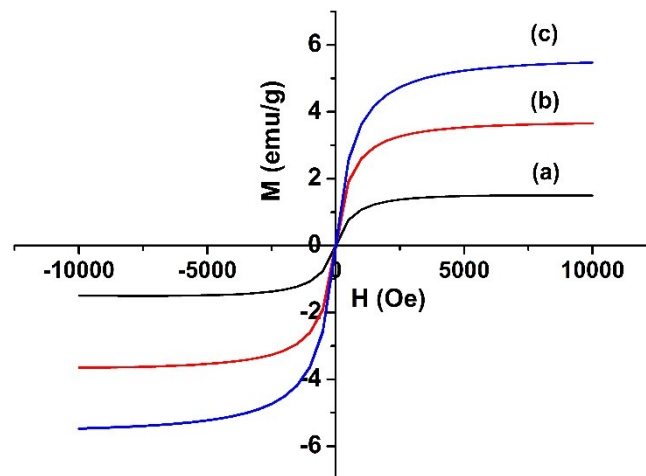

**Fig. S4** Field-dependent hysteresis curves at 300 K of the three samples measured by using VSM in the range of 10000 Oe. (a) Fe<sub>3</sub>O<sub>4</sub>@DMSSs-5, (b) Fe<sub>3</sub>O<sub>4</sub>@DMSSs-15, (c) Fe<sub>3</sub>O<sub>4</sub>@DMSSs-30.

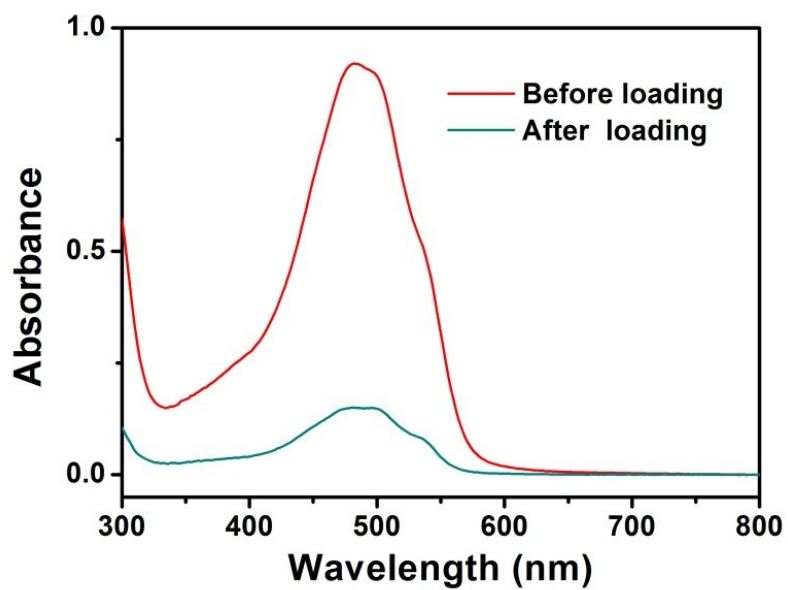

**Fig. S5** UV-vis absorbance spectra of DOX solutions before and after stirring with  $\text{Fe}_3\text{O}_4\text{@DMSSs}$ -5 for 24h.

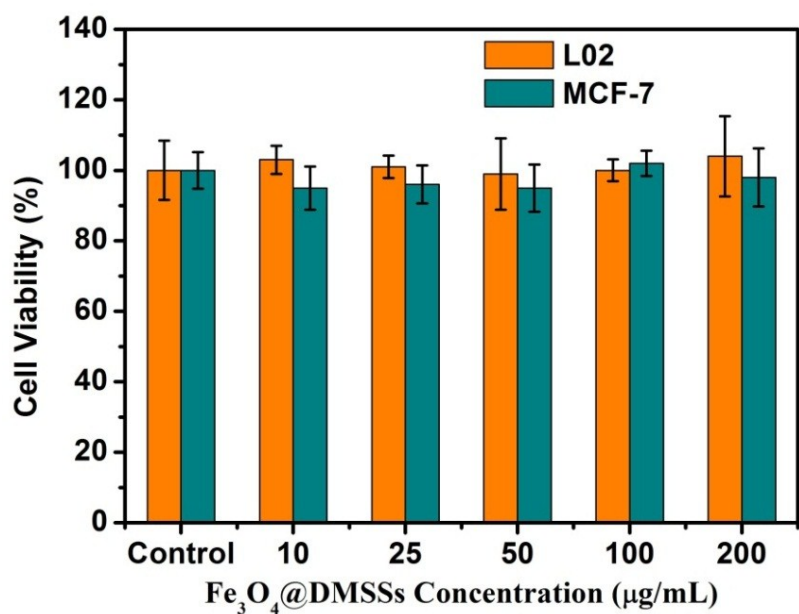

**Fig. S6** *In vitro* cell viabilities of L02 cells and MCF-7 cells incubated with  $\text{Fe}_3\text{O}_4\text{@DMSSs}$  at different concentrations for 24 h.
